# Supplementary material for: Decreasing rates of cost-related medication non-adherence by age advancement among American generational cohorts 2004–2014: a longitudinal study
Source: HighWire-hosted journal article supplement (doi:10.1136/bmjopen-2021-051480), 2022-05-01
Supplement: bmjopen-2021-051480supp001_data_supplement.pdf [file bmjopen-2021-051480supp001_data_supplement.pdf]

**Appendix I. Source of Income**

| <b>Economic Variables</b>                   |
|---------------------------------------------|
| <b>SOCIAL SECURITY INCOME</b>               |
| <b>SUPPLEMENTAL SECURITY INCOME</b>         |
| <b>AMOUNT FROM WORK SELF EMPL LCY</b>       |
| <b>AMOUNT FROM WAGES AND SALARY LCY</b>     |
| <b>AMOUNT FROM PROF PRAC OR TRADE LCY</b>   |
| <b>AMOUNT FROM TIP BONUS COMMISSION LCY</b> |
| <b>AMOUNT FROM WORK 2ND JOB LCY</b>         |
| <b>AMOUNT FROM UNEMPLOYMENT - LCY</b>       |
| <b>AMOUNT FROM WORKERS COMP LCY</b>         |
| <b>AMOUNT FROM WELFARE LCY</b>              |
| <b>INC FROM OTHER IRA ANNUITY AMT</b>       |
| <b>OTHER PENSIONS</b>                       |
| <b>OTHER ANNUITIES</b>                      |
| <b>STOCK INCOME AMOUNT - LCY</b>            |
| <b>BOND INCOME AMOUNT - LCY</b>             |
| <b>CDS INCOME AMOUNT - LCY</b>              |
| <b>OTHER ASSET INCOME AMOUNT</b>            |
| <b>OTHER SOURCES OF INCOME AMOUNT - LCY</b> |
| <b>VETERAN BENEFITS</b>                     |
| <b>AMOUNT RECEIVED FROM PENSION</b>         |
| <b>AMOUNT FROM ANNUITY</b>                  |
| <b>AMOUNT FROM FOOD STAMPS</b>              |
